# Supplementary material for: Shape dependent photocatalytic H2 evolution of a zinc porphyrin
Source: Royal Society of Chemistry journal article supplement (doi:10.1039/d2dt00556e), 2022-01-01
Supplement: d2dt00556e1.pdf [file d2dt00556e1.pdf]

## Supporting Information for

### Shape dependent photocatalytic H<sub>2</sub> evolution of a zinc porphyrin

Emmanouil Orfanos,<sup>a</sup> Kalliopi Ladomenou,<sup>b\*</sup> Panagiotis Angaridis,<sup>c</sup> Athanassios G. Coutsoulelos<sup>a,d\*</sup>

<sup>a</sup> *University of Crete, Department of Chemistry, Laboratory of Bioinorganic Chemistry, Voutes Campus, 70013, Heraklion, Crete, Greece.*

<sup>b</sup> *International Hellenic University, Department of Chemistry, Laboratory of Inorganic Chemistry, Agios Loukas, 65404, Kavala Campus, Greece.*

<sup>c</sup> *Aristotle University of Thessaloniki, Department of General and Inorganic Chemistry, Faculty of Chemistry, GR-54124 Thessaloniki, Greece.*

<sup>d</sup> *Institute of Electronic Structure and Laser (IESL) Foundation for Research and Technology - Hellas (FORTH), Vassilika Vouton, GR 70013 Heraklion, Crete, Greece*

### Corresponding Authors

E-mail: [acoutsol@uoc.gr](mailto:acoutsol@uoc.gr) (A.G.C.); [kladomenou@chem.ihu.gr](mailto:kladomenou@chem.ihu.gr) (K.L.);  
[panosangaridis@chem.auth.gr](mailto:panosangaridis@chem.auth.gr) (P.A.); [manosorf17@gmail.com](mailto:manosorf17@gmail.com) (E.O.)

## Experimental Procedure

In a typical procedure the photosensitizers were prepared as following: 5 mgr of **ZnTPP** was placed in a small vial and 0.5 ml of a “good” solvent was added. When **ZnTPP** was fully dissolved 2 ml of methanol was inserted. The solution was stirred vigorously with sonication for one minute, then the mixture was capped and left to stand at r.t. After 48 h the solvents were removed in vacuum oven. In order to perform the photocatalytic experiment in the same vial, 5 ml of ascorbic acid and 5% w/w  $\text{Na}_2\text{PtCl}_6 \cdot 6\text{H}_2\text{O}$  were added. The mixture was irradiated with a 100 W white led lamp. The same process was repeated for the three different “good” solvents THF,  $\text{CHCl}_3$ , Tol.

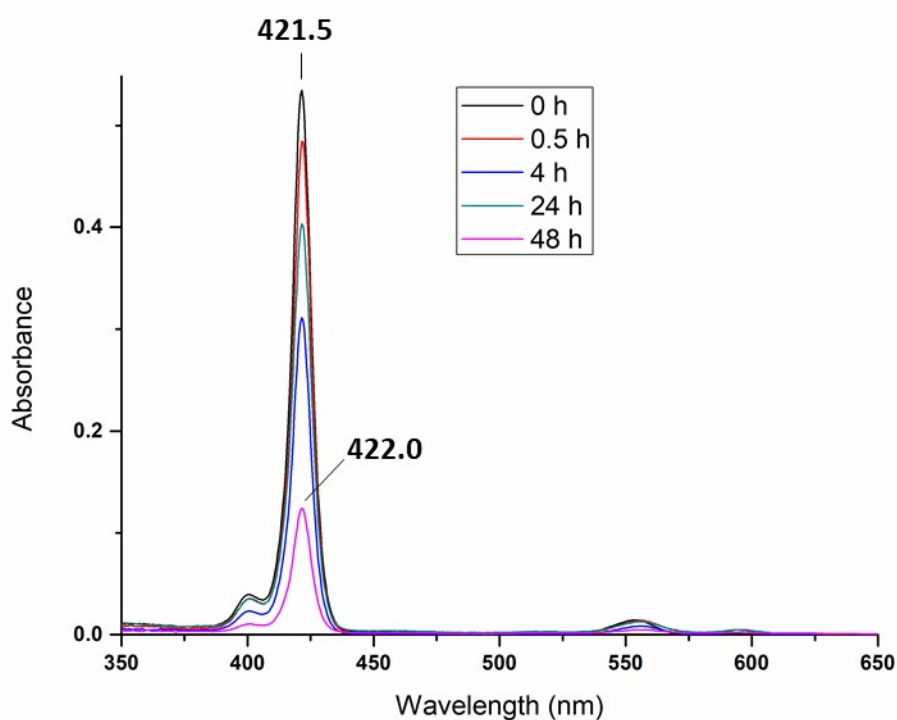

**Figure S1.** UV-Vis spectra of octahedral (THF/MeOH 1:4) in solution at various time intervals 0 h, 0.5 h, 4 h, 24 h, 48 h.

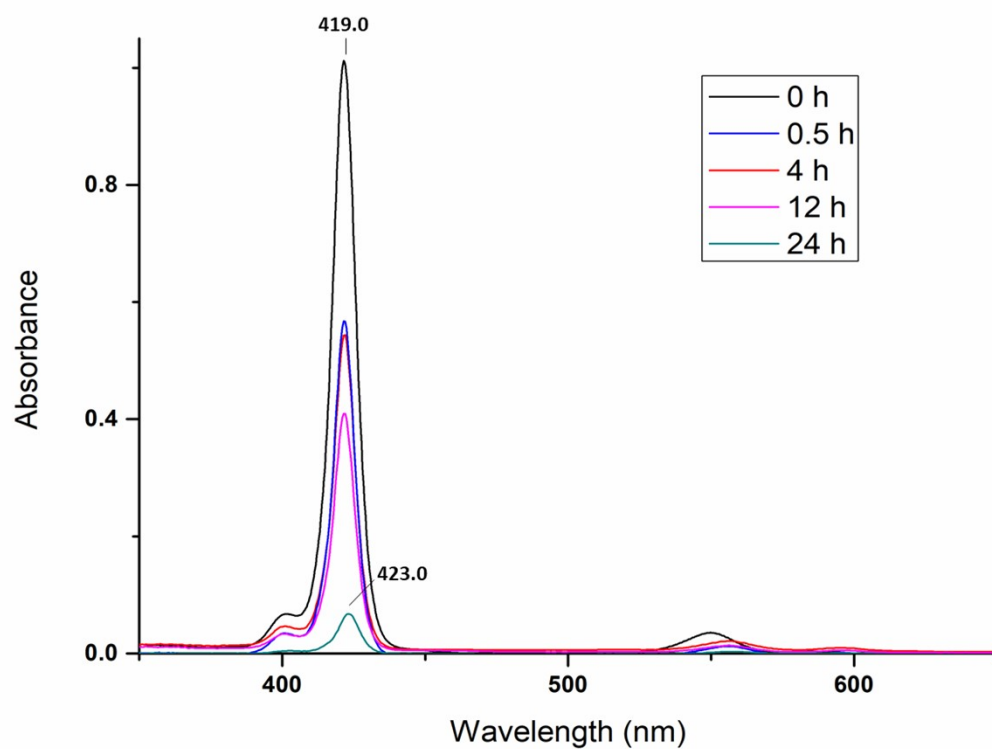

**Figure S2.** UV-Vis spectra of flowers (CHCl<sub>3</sub>/MeOH 1:4) in solution at various time intervals 0 h, 0.5 h, 4 h, 24 h, 48 h.

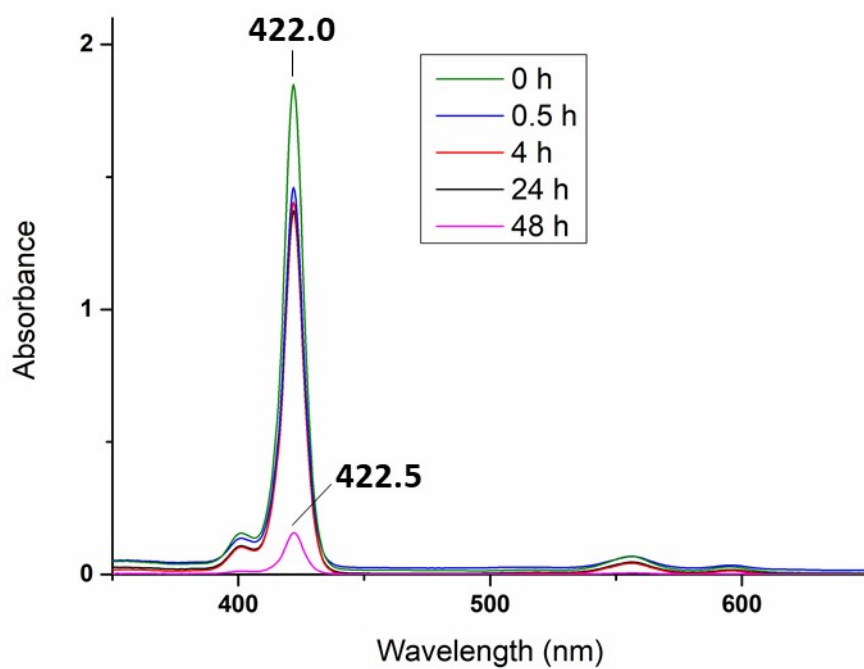

**Figure S3.** UV-Vis spectra of manta-ray (Tol/MeOH 1:4) in solution at various time intervals 0 h, 0.5 h, 4 h, 24 h, 48 h.

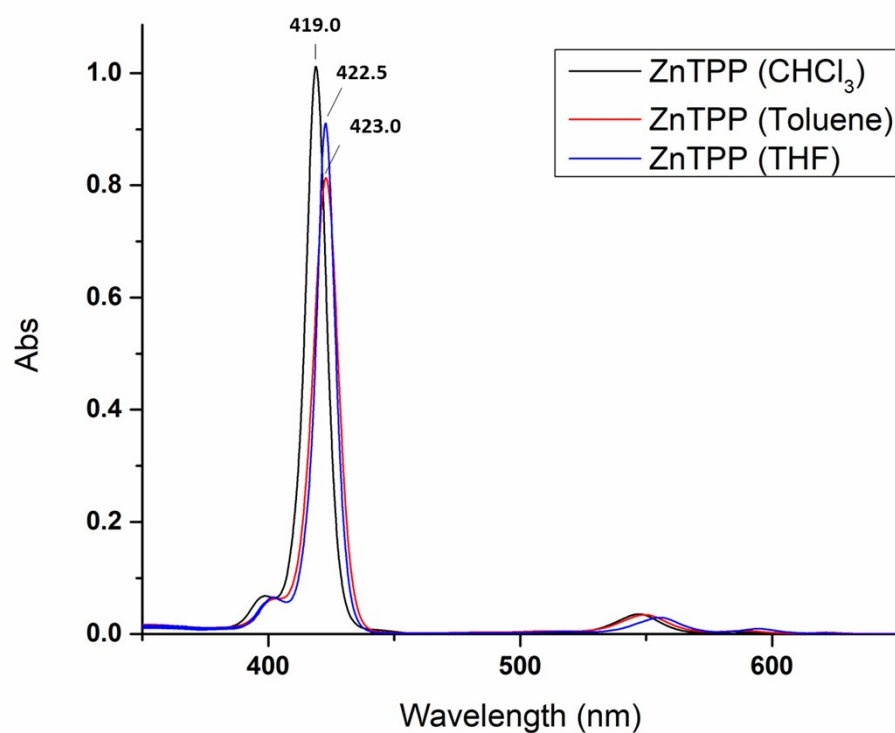

**Figure S4.** UV-Vis spectra of ZnTPP in CHCl<sub>3</sub>, Toluene and THF.

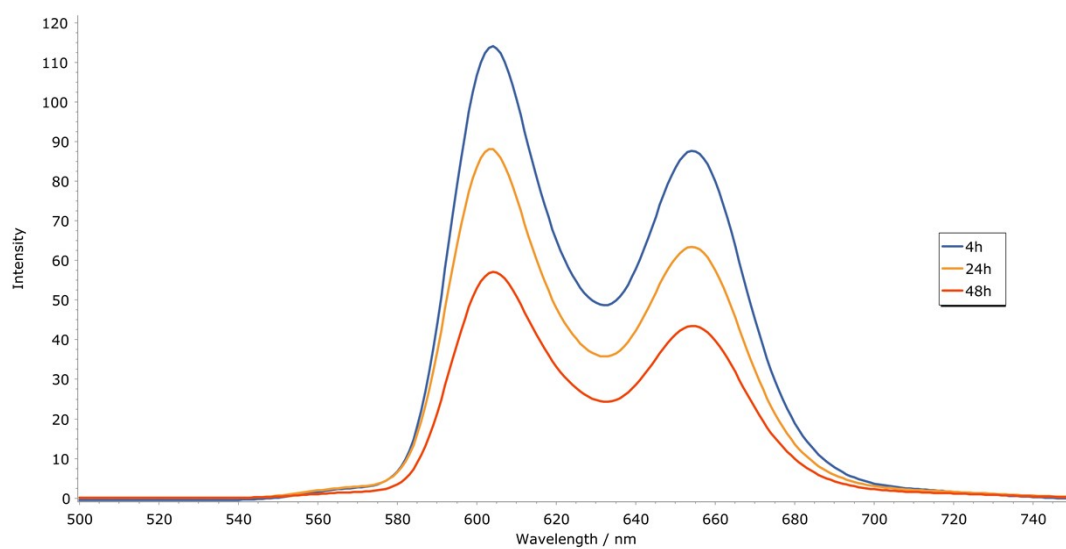

**Figure S5.** Fluorescence spectra of octahedral (THF/MeOH 1:4) in solution at various time intervals 4 h, 24 h, 48 h.

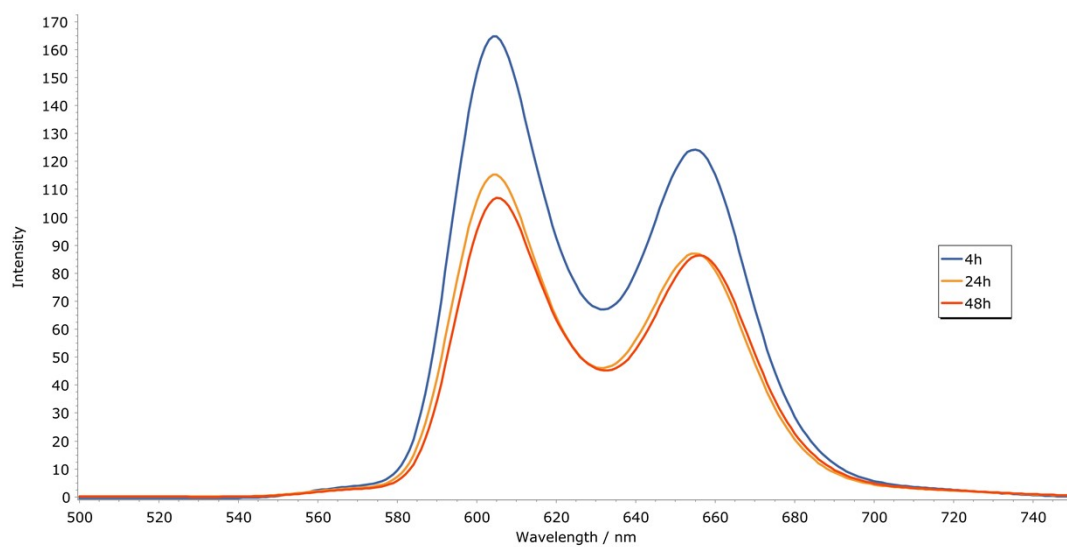

**Figure S6.** Fluorescence spectra of flowers (CHCl<sub>3</sub>/MeOH 1:4) in solution at various time intervals 4 h, 24 h, 48 h.

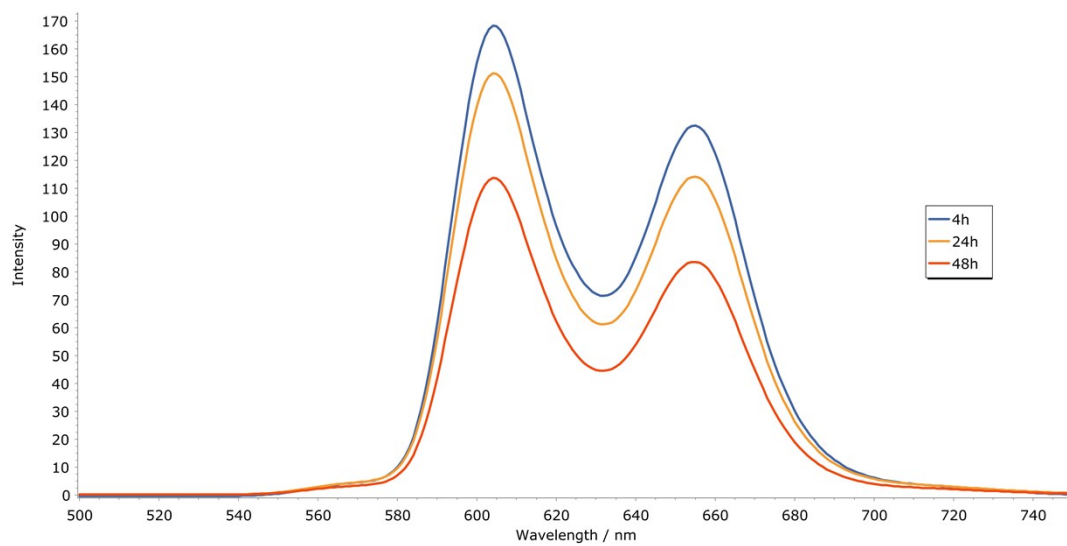

**Figure S7.** Fluorescence spectra of manta-ray (Tol/MeOH 1:4) in solution at various time intervals 4 h, 24 h, 48 h.

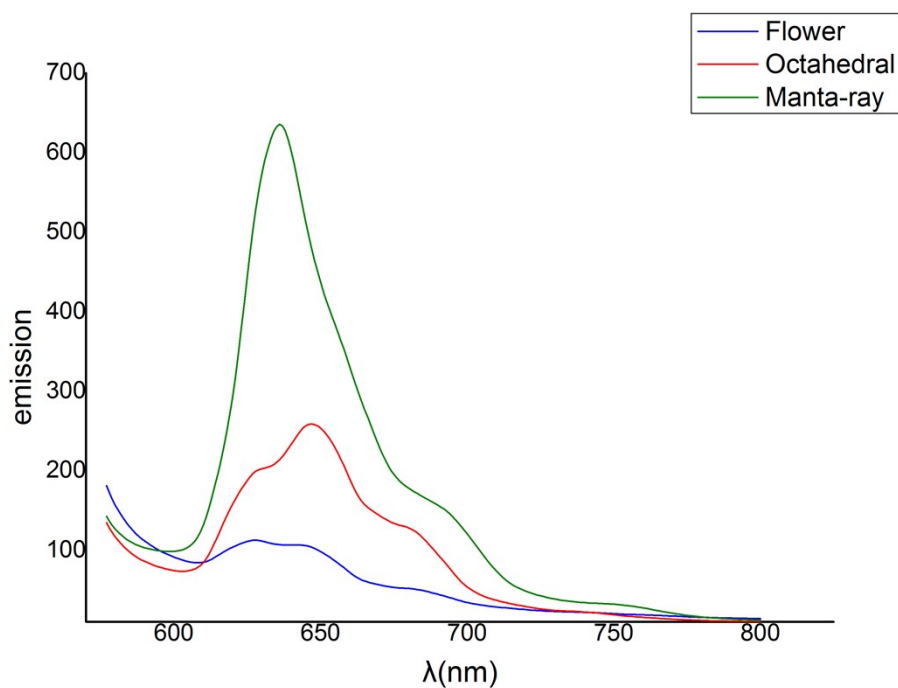

**Figure S8.** Fluorescence spectra of **ZnTPP** in solid state upon its formation of different structures.

**Table S1.** Lifetime decay fluorescence measurements of **ZnTPP** in different solid structures and in solution.

| Photosensitizer                                                            | Lifetime ( $\tau_1$ ) (ns) | Lifetime ( $\tau_2$ ) (ns) |
|----------------------------------------------------------------------------|----------------------------|----------------------------|
| Octahedral (solid)                                                         | 0.58 (70%)                 | 1.96 (30%)                 |
| “flower” (solid)                                                           | 0.70 (66%)                 | 2.46 (34%)                 |
| “manta-ray” (solid)                                                        | 0.76 (60%)                 | 2.49 (40%)                 |
| <b>ZnTPP</b> (in $\text{CH}_2\text{Cl}_2$ )                                |                            | 1.97 (100%)                |
| <b>ZnTPP</b> (24 h, solution of $\text{CHCl}_3/\text{MeOH}$ , 1:4 mixture) |                            | 2.10 (100%)                |
| <b>ZnTPP</b> (48 h, solution of $\text{CHCl}_3/\text{MeOH}$ , 1:4 mixture) |                            | 2.20 (100%)                |

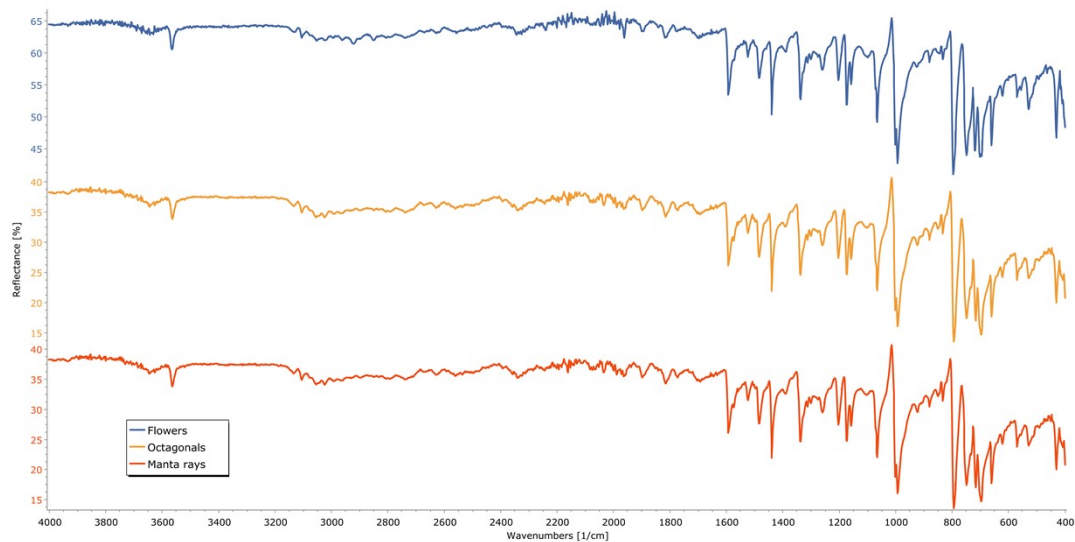

**Figure S9.** IR spectra of a) octahedral (THF/MeOH 1:4), b) flowers (CHCl<sub>3</sub>/MeOH) and c) manta-ray (Tol/MeOH)

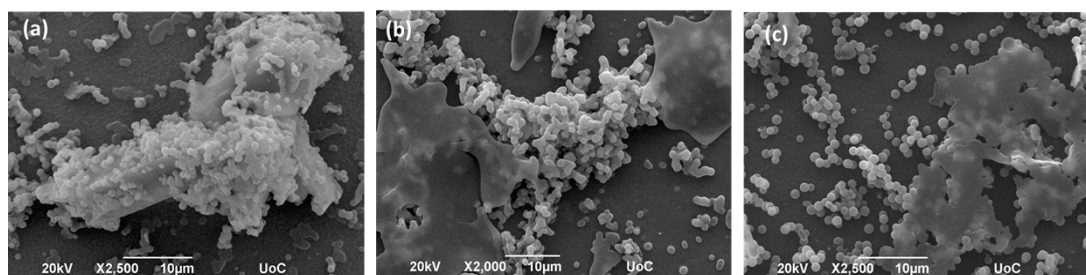

**Figure S10.** SEM images of supramolecular architectures with different morphologies of ZnTPP formed after 8 h of light irradiation in good/bad solvent: a) octahedral (THF/MeOH 1:4), b) flower (CHCl<sub>3</sub>/MeOH 1:4), c) manta-ray (Tol/MeOH 1:4).

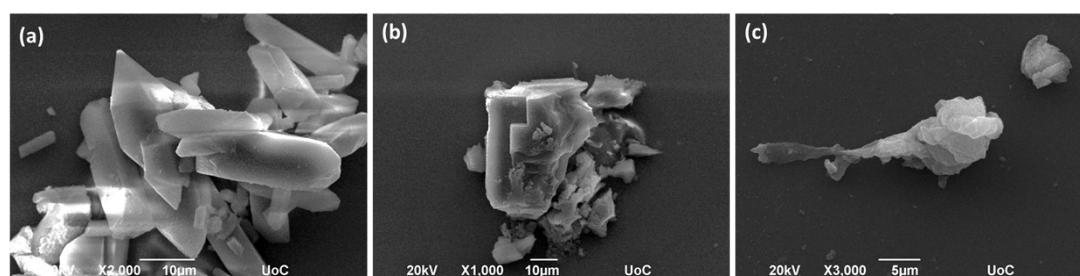

**Figure S11.** SEM images of supramolecular architectures with different morphologies of ZnTPP formed in water and in the presence of 5% w/w Pt and ascorbic acids 1 M, after 8 h in the dark: a) octahedral (THF/MeOH 1:4), b) flower (CHCl<sub>3</sub>/MeOH 1:4), c) manta-ray (Tol/MeOH 1:4).

## Single crystal X-ray diffraction analysis

### Experimental

Single crystals of **ZnTPP**(THF)<sub>2</sub> were obtained by slow evaporation of a THF/CH<sub>3</sub>OH solution of the compound at room temperature over a period of two weeks.[1] A suitable crystal was selected and mounted on a STOE IPDS diffractometer. The crystal was kept at 293(2) K during data collection. Using Olex2 1.3 [2], the structure was solved with the SHELXS [3] structure solution program using Direct Methods and refined with the SHELXL 2018/3 [4] refinement package using Least Squares minimization.

Summary of Crystal Data for **ZnTPP**(THF)<sub>2</sub>. Formula C<sub>52</sub>H<sub>44</sub>N<sub>4</sub>O<sub>2</sub>Zn (M<sub>r</sub> = 822.28 g/mol): triclinic, space group P-1, a = 9.6632(19) Å, b = 11.266(2) Å, c = 11.812(2) Å, α = 65.13(3)°, β = 76.23(3)°, γ = 64.73(3)°, V = 1052.4(5) Å<sup>3</sup>, Z = 2, T = 293(2) K, μ(MoKα) = 0.63 mm<sup>-1</sup>, 3938 reflections measured (1.9° ≤ θ ≤ 25.6°), 2347 unique (R<sub>int</sub> = 0.0661, R<sub>sigma</sub> = 0.1242) which were used in all calculations. The final R<sub>1</sub> was 0.038 (I > 2σ(I)) and wR2 was 0.072 (all data).

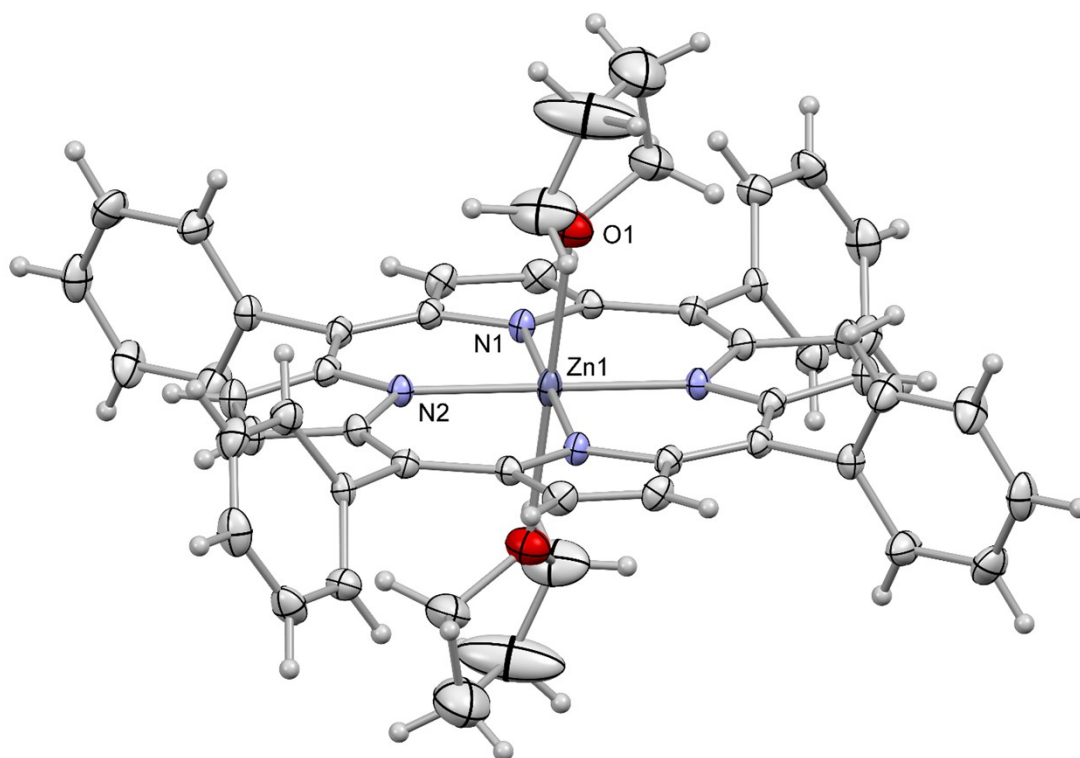

**Figure S9.** View of the crystal structure of **ZnTPP**(THF)<sub>2</sub> with displacement ellipsoids shown in the 35% probability level (Color code: C atoms, dark gray ellipsoids; O atoms, red ellipsoids; N atoms, blue ellipsoids; Zn, light mauve ellipsoid; H atoms, gray spheres of arbitrary radius).



**Table S2.** Experimental details for **ZnTPP(THF)<sub>2</sub>**

| <i>Crystal data</i>                                                                                                     |                                                                  |
|-------------------------------------------------------------------------------------------------------------------------|------------------------------------------------------------------|
| Moiety formula                                                                                                          | C <sub>52</sub> H <sub>44</sub> N <sub>4</sub> O <sub>2</sub> Zn |
| <i>M<sub>r</sub></i>                                                                                                    | 822.28                                                           |
| Crystal system, space group                                                                                             | Triclinic, <i>P</i> -1                                           |
| <i>a</i> , <i>b</i> , <i>c</i> (Å)                                                                                      | 9.6632 (19), 11.266 (2), 11.812 (2)                              |
| $\alpha$ , $\beta$ , $\gamma$ (°)                                                                                       | 65.13 (3), 76.23 (3), 64.73 (3)                                  |
| <i>V</i> (Å <sup>3</sup> )                                                                                              | 1052.4 (5)                                                       |
| <i>Z</i>                                                                                                                | 1                                                                |
| $\rho_{\text{calc}}$ (g cm <sup>-3</sup> )                                                                              | 1.298                                                            |
| <i>F</i> (000)                                                                                                          | 430                                                              |
| Radiation type                                                                                                          | Mo <i>K</i> $\alpha$ ( $\lambda$ = 0.71073 Å)                    |
| Temperature (K)                                                                                                         | 293                                                              |
| $\mu$ (mm <sup>-1</sup> )                                                                                               | 0.630                                                            |
| Crystal size (mm)                                                                                                       | 0.6 × 0.2 × 0.07                                                 |
| <i>Data collection</i>                                                                                                  |                                                                  |
| Diffractometer                                                                                                          | STOE IPDS                                                        |
| No. of measured, independent and observed [ <i>I</i> > 2 $\sigma$ ( <i>I</i> )] reflections                             | 3938, 3938, 2347                                                 |
| <i>R</i> <sub>int</sub>                                                                                                 | 0.0661                                                           |
| $\vartheta$ range for data collection (°)                                                                               | 1.9 to 25.6                                                      |
| <i>Refinement</i>                                                                                                       |                                                                  |
| <i>R</i> [ <i>F</i> <sup>2</sup> > 2 $\sigma$ ( <i>F</i> <sup>2</sup> )], <i>wR</i> ( <i>F</i> <sup>2</sup> ), <i>S</i> | 0.038, 0.072, 0.74                                               |
| No. of reflections                                                                                                      | 3938                                                             |
| No. of parameters                                                                                                       | 268                                                              |
| H-atom treatment                                                                                                        | H-atom parameters constrained                                    |
| $\Delta\rho_{\text{max}}$ , $\Delta\rho_{\text{min}}$ (e Å <sup>-3</sup> )                                              | 0.42, -0.30                                                      |

**Table S3.** Selected Bond Lengths for **ZnTPP(THF)<sub>2</sub>**.**Atom Atom Length/Å**

Zn1 N1 2.072 (2)

Zn1 N2 2.060 (2)

Zn1 O1 2.419 (3)

**Table S4.** Selected Bond Angles for **ZnTPP(THF)<sub>2</sub>**.

**Atom Atom Atom Angle/°**

|                 |     |                 |             |
|-----------------|-----|-----------------|-------------|
| N1              | Zn1 | N1 <sup>i</sup> | 180.0       |
| N1              | Zn1 | N2              | 89.40 (8)   |
| N1              | Zn1 | O1 <sup>i</sup> | 93.24 (8)   |
| N1              | Zn1 | O1              | 86.76 (8)   |
| N1              | Zn1 | N2 <sup>i</sup> | 90.60 (8)   |
| N2              | Zn1 | N2 <sup>i</sup> | 180.0       |
| N2              | Zn1 | N1 <sup>i</sup> | 90.60 (8)   |
| N2              | Zn1 | O1 <sup>i</sup> | 87.11 (9)   |
| N2              | Zn1 | O1              | 92.89 (9)   |
| O1 <sup>i</sup> | Zn1 | O1              | 180.00 (10) |

<sup>1</sup> (i) -x, -y, -z

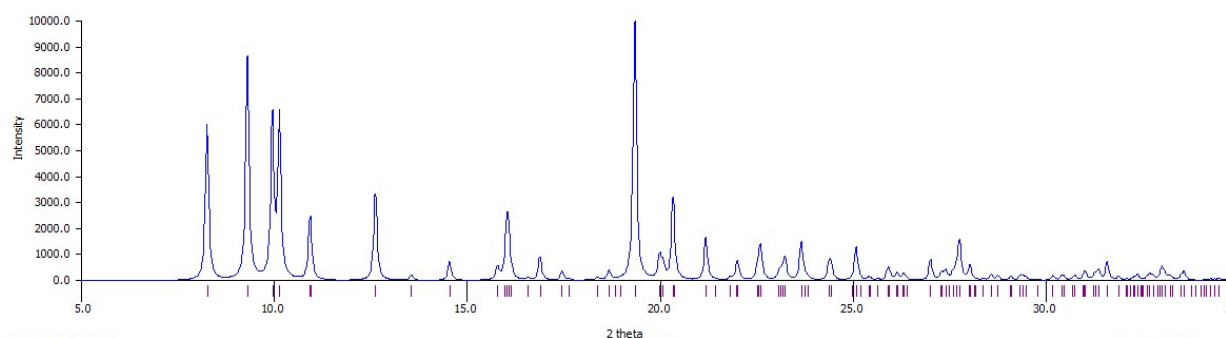

**Figure S10.** Simulated PXRD pattern obtained from the single-crystal X-ray structure of ZnTPP(THF)<sub>2</sub>.

**References**

1. Coutsolelos A. G., Orfanos E., Ladomenou K., Angaridis P., CCDC 2153314: Experimental Crystal Structure Determination, 2022, DOI: 10.5517/ccdc.csd.cc2b8pr2
2. Dolomanov, O.V., Bourhis, L.J., Gildea, R.J, Howard, J.A.K. & Puschmann, H. (2009), J. Appl. Cryst. 42, 339-341.
3. Sheldrick, G. M. (2008). Acta Cryst. A64, 112-122

4. ShelDRICK, G.M. (2015). *Acta Cryst.* C71, 3-8.
